# Supplementary material
Source: HighWire-hosted journal article supplement (https://jitc.bmj.com/content/10/9/e005116)
Supplement: inline-supplementary-material-3 [file inline-supplementary-material-3.pdf]

## Supplementary Figure S2

|                         | <b>K210</b>                                                   | <b>K233</b> |
|-------------------------|---------------------------------------------------------------|-------------|
| <b>Human (201-243)</b>  | GARRTGQPL <b>K</b> EDPSAVPVFSVDYGELDFQWRE <b>K</b> TPEPPVPCVP |             |
| <b>Mouse (203-245)</b>  | GAGSKDDTL <b>K</b> EEPSAAPVPSVAYEELDFQGRE <b>K</b> TPELPTACVH |             |
| <b>Rat (203-245)</b>    | EAGRKEDPP <b>K</b> EAHAAAPVPSVAYEELDFQGRE <b>K</b> TPEPAPCVHT |             |
| <b>Bovine (203-245)</b> | ARRSQDQPP <b>K</b> EGCPSVPAVTVDYGELDFQWRE <b>K</b> TPEPAAPCVP |             |
