# Supplementary material
Source: HighWire-hosted journal article supplement (https://jitc.bmj.com/content/10/9/e005116)

## Supplementary Figure S4

A

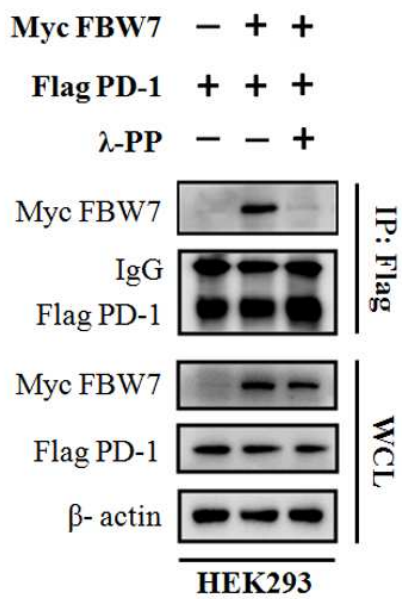

B

## CDK1 consensus sequence

S/T-P-x-K/R-x

|                      |                           |
|----------------------|---------------------------|
| Human (254-268)      | PSGMGTSS <b>P</b> ARRGSA  |
| Chimpanzee (254-268) | PSGMGTSS <b>P</b> ARRGSA  |
| Monkey (254-268)     | PSGLGTSS <b>P</b> ARRGSA  |
| Dog (254-268)        | VFPGRPAS <b>P</b> GRRASA  |
| Pigeon (255-270)     | IFPEEKPI <b>T</b> PERGKKH |

C

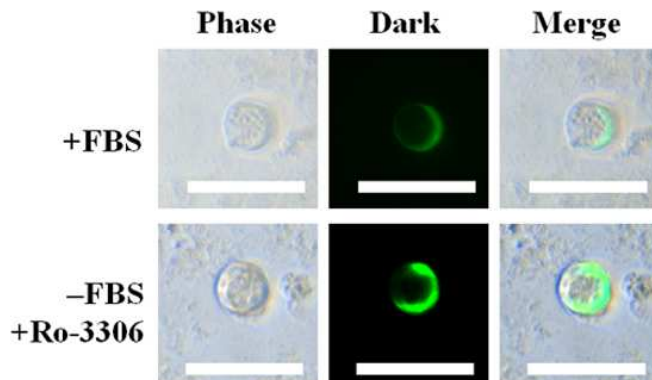

Supplement: inline-supplementary-material-5 [file inline-supplementary-material-5.pdf]
